# Supplementary material for: Gene Expression Profiling in the Striatum of Per2 KO Mice Exhibiting More Vulnerable Responses against Methamphetamine
Source: PubMed Central journal article supplement — Biomol Ther (Seoul). 2020 Dec 21;29(2):135–43. doi: 10.4062/biomolther.2020.123 (PMC7921858; doi:10.4062/biomolther.2020.123), 2020-12-21

# 1. KEGG heatmap of drug naïve *Per2* KO and WT mice

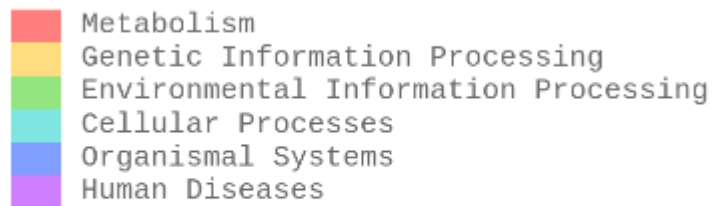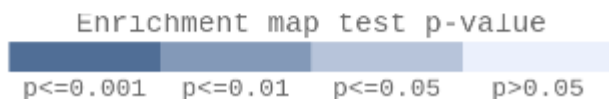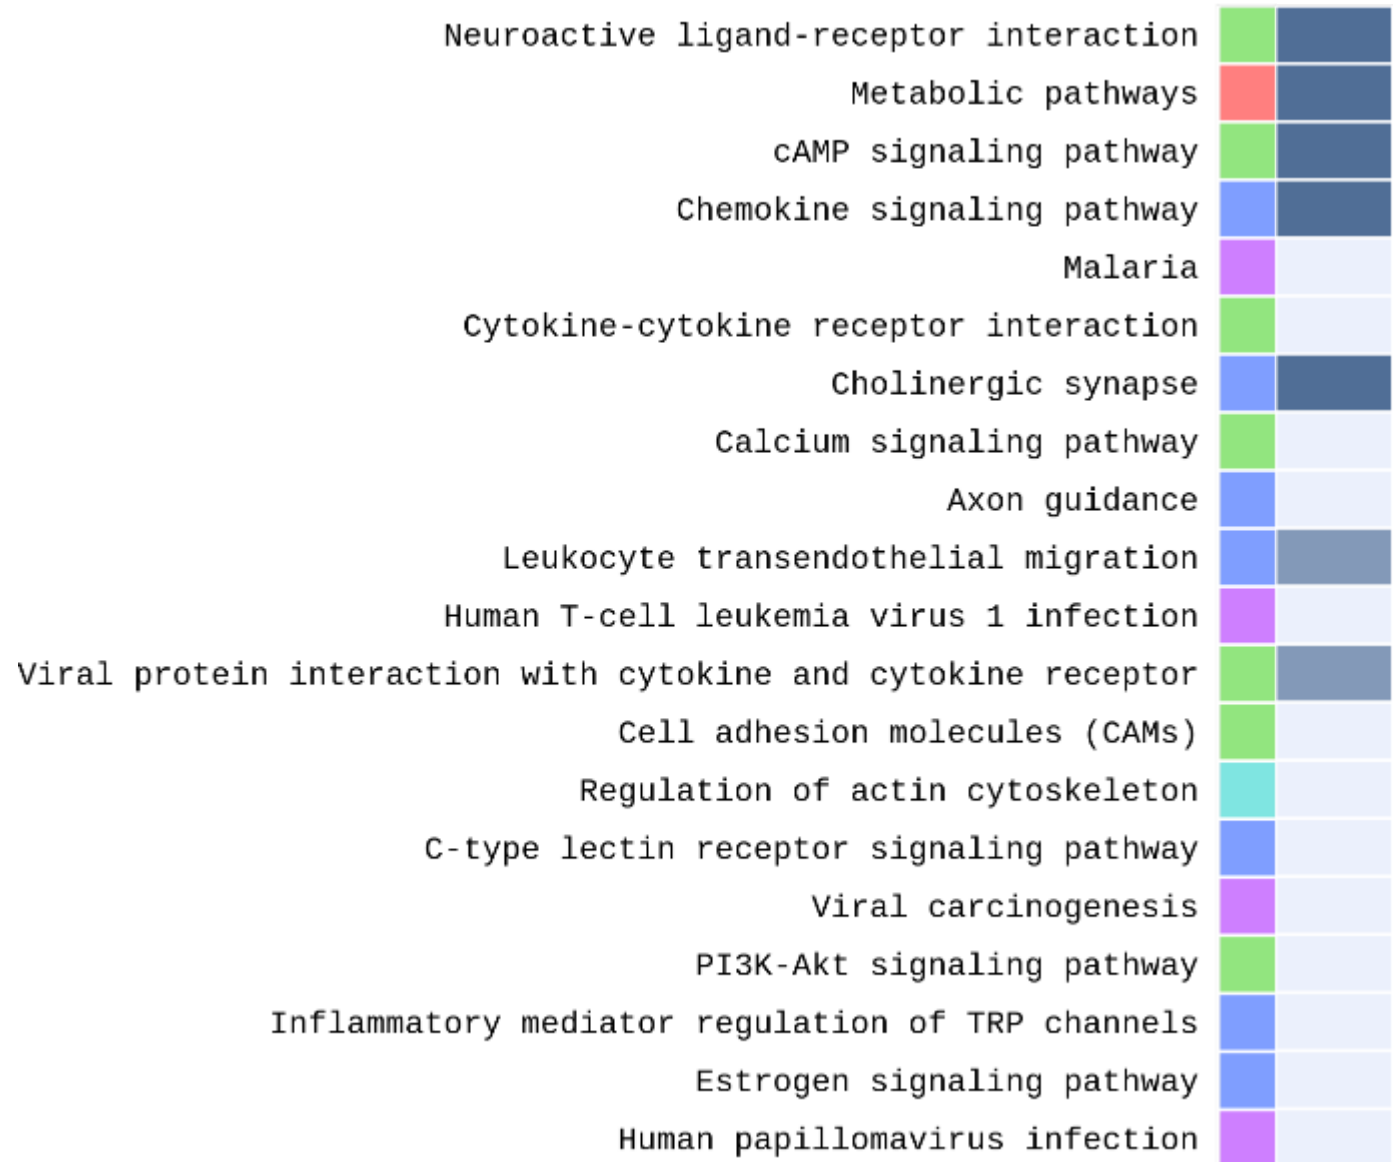

## 2. KEGG heatmap of before/after METH treatment in *Per2* KO mice

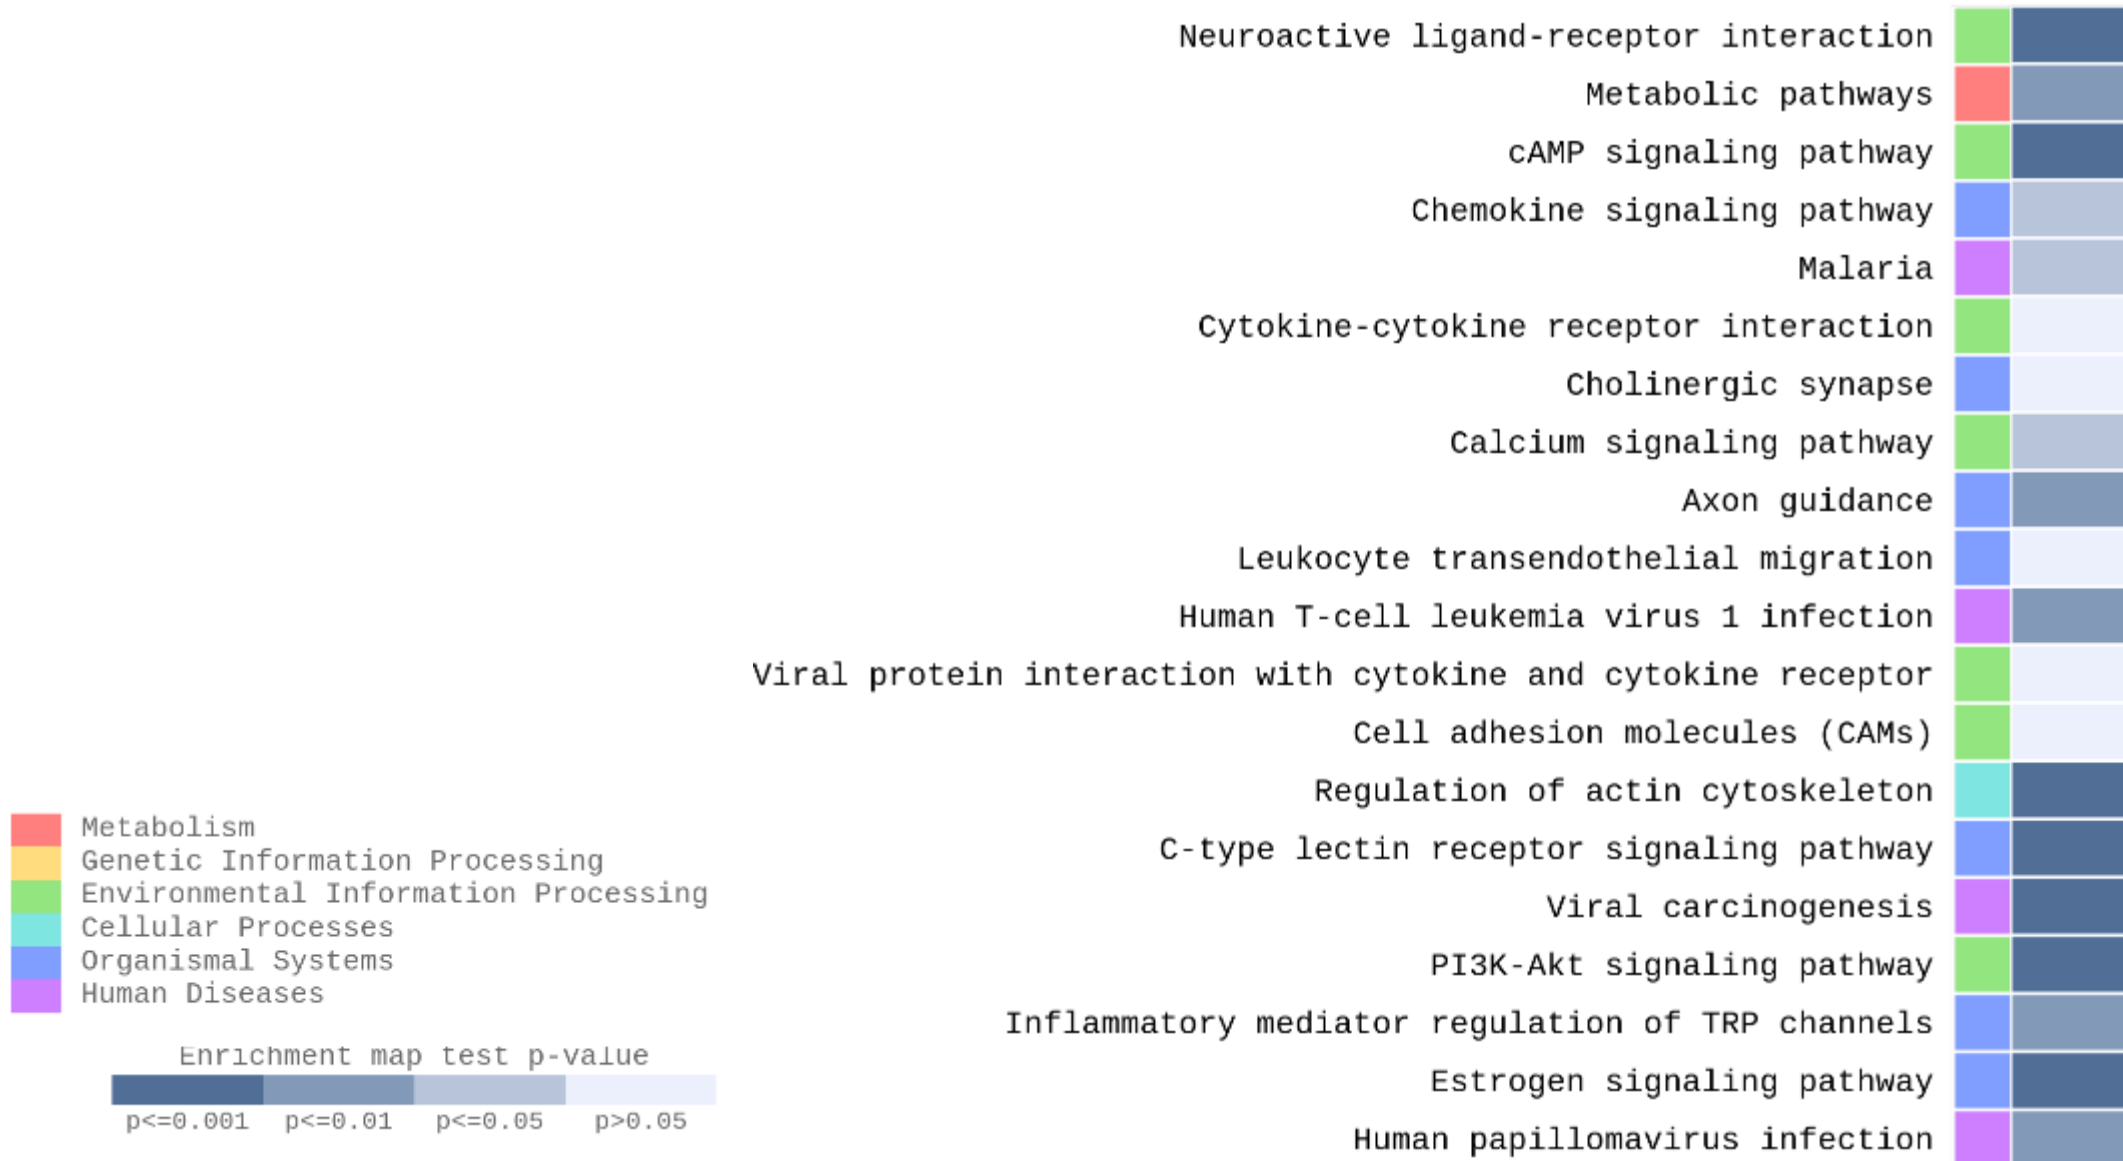

Supplement: bt-29-2-135-supple1.pdf [file bt-29-2-135-supple1.pdf]
