# Supplementary material for: Gene Expression Profiling in the Striatum of Per2 KO Mice Exhibiting More Vulnerable Responses against Methamphetamine
Source: PubMed Central journal article supplement — Biomol Ther (Seoul). 2020 Dec 21;29(2):135–43. doi: 10.4062/biomolther.2020.123 (PMC7921858; doi:10.4062/biomolther.2020.123), 2020-12-21
Supplement: bt-29-2-135-supple2.pdf [file bt-29-2-135-supple2.pdf]

**Table S1 Common up-regulated genes in the striatum of drug naïve Per2 KO/WT mice**

| <b>Gene_ID</b> | <b>Transcript_ID</b>                                              | <b>Gene_Symbol</b> | <b>Gene title</b>                                                | <b>Mean fold change</b> |
|----------------|-------------------------------------------------------------------|--------------------|------------------------------------------------------------------|-------------------------|
| 74466          | NM_028955                                                         | 4933427G17Rik      | RIKEN cDNA 4933427G17 gene                                       | <b>2.65</b>             |
| 328324         | NR_046158                                                         | 5930438M14Rik      | RIKEN cDNA 5930438M14 gene                                       | <b>3.13</b>             |
| 74400          | NM_028913                                                         | Zfp819             | zinc finger protein 819                                          | <b>2.58</b>             |
| 15207          | NM_008237                                                         | Hes3               | hairy and enhancer of split 3 (Drosophila)                       | <b>3.35</b>             |
| 76633          | NM_028275                                                         | 1700112E06Rik      | RIKEN cDNA 1700112E06 gene                                       | <b>7.59</b>             |
| 381411         | NM_001033452                                                      | Accsl              | 1-aminocyclopropane-1-carboxylate synthase (non-functional)-like | <b>2.83</b>             |
| 102634101      | NR_110511                                                         | Gm31763            | predicted gene, 31763                                            | <b>3.02</b>             |
| 18770          | NM_001099779,NM_013631                                            | Pklr               | pyruvate kinase liver and red blood cell                         | <b>3.02</b>             |
| 104692         | NR_130637                                                         | Gm12108            | predicted gene 12108                                             | <b>2.22</b>             |
| 11499          | NM_001272057,NM_001272058,<br>NM_001272059,NM_007401              | Adam5              | a disintegrin and metallopeptidase domain 5                      | <b>3.41</b>             |
| 71908          | NM_027998                                                         | Cldn23             | claudin 23                                                       | <b>2.29</b>             |
| 233080         | NM_001033316                                                      | Ffar3              | free fatty acid receptor 3                                       | <b>2.67</b>             |
| 211623         | NM_207229,NM_207229_dup1,<br>NM_207229_dup2                       | Plac9a             | placenta specific 9a                                             | <b>2.04</b>             |
| 17528          | NM_001315499,NM_001315500,NM_008623                               | Mpz                | myelin protein zero                                              | <b>2.73</b>             |
| 100038732      | NR_126070,NR_126071                                               | Gm11681            | predicted gene 11681                                             | <b>2.78</b>             |
| 73234          | NM_028473                                                         | 3110079O15Rik      | RIKEN cDNA 3110079O15 gene                                       | <b>2.59</b>             |
| 228003         | NM_001081087                                                      | Klhl41             | kelch-like 41                                                    | <b>2.34</b>             |
| 75317          | NM_029249                                                         | Parpbbp            | PARP1 binding protein                                            | <b>2.34</b>             |
| 625237         | NR_136901                                                         | Gm6566             | predicted gene 6566                                              | <b>2.01</b>             |
| 16428          | NM_001281965,NM_001281966,NM_001281967,<br>NM_001281968,NM_010583 | Itk                | IL2 inducible T cell kinase                                      | <b>2.25</b>             |
| 100134990      | NR_004857                                                         | Gm12060            | predicted gene 12060                                             | <b>2.13</b>             |
| 329093         | NM_001289497,NM_177834                                            | Cpa6               | carboxypeptidase A6                                              | <b>3.52</b>             |
| 14659          | NM_008132                                                         | Glrp1              | glutamine repeat protein 1                                       | <b>17.57</b>            |
| 665934         | NR_028417                                                         | Gm7854             | predicted gene 7854                                              | <b>2.68</b>             |

|           |                                                            |                    |                                                                    |                   |
|-----------|------------------------------------------------------------|--------------------|--------------------------------------------------------------------|-------------------|
| 278672    | NM_183389,NM_183389_dup1                                   | Duxbl1             | double homeobox B-like 1                                           | <b>4.00</b>       |
| 21830     | NM_011583,NM_199226                                        | Theg               | testicular haploid expressed gene                                  | <b>3.10</b>       |
| 434794    | NM_001081642                                               | Xlr4a              | X-linked lymphocyte-regulated 4A                                   | <b>13.67</b>      |
| 71872     | NM_023631                                                  | Aox4               | aldehyde oxidase 4                                                 | <b>2.44</b>       |
| 208084    | NM_172453                                                  | Pif1               | PIF1 5'-to-3' DNA helicase                                         | <b>2.04</b>       |
| 100862247 | NM_001270432,NM_001270432_dup1,<br>NM_001270432_dup2       | Gm21586            | predicted gene, 21586                                              | <b>2.14</b>       |
| 100039293 | NM_001177539,NM_001177539_dup1,<br>NM_001177539_dup2       | Duxbl3             | double homeobox B-like 3                                           | <b>4.15</b>       |
| 170788    | NM_133239                                                  | Crb1               | crumbs family member 1, photoreceptor morphogenesis associated     | <b>2.16</b>       |
| 73301     | NM_183096                                                  | Ttc29              | tetratricopeptide repeat domain 29                                 | <b>2.26</b>       |
| 327747    | NM_177793                                                  | Mettl24            | methyltransferase like 24                                          | <b>2.07</b>       |
| 13524     | NM_010084,NR_136908                                        | Adam18             | a disintegrin and metallopeptidase domain 18                       | <b>2.64</b>       |
| 219132    | NM_199015                                                  | Phf11d             | PHD finger protein 11D                                             | <b>2.11</b>       |
| 71313     | NM_027759                                                  | Fsip1              | fibrous sheath-interacting protein 1                               | <b>2.01</b>       |
| 11624     | NM_001317351,NM_009644                                     | Ahrr               | aryl-hydrocarbon receptor repressor                                | <b>2.30</b>       |
| 22064     | NM_001109897                                               | Trpc2              | transient receptor potential cation channel, subfamily C, member 2 | <b>2942850.37</b> |
| 105734727 | NM_001308449                                               | Emc8-1190005i06rik | Emc8-1190005i06Rik readthrough                                     | <b>2.84</b>       |
| 69513     | NR_015521                                                  | 1700030C10Rik      | RIKEN cDNA 1700030C10 gene                                         | <b>2.11</b>       |
| 19892     | NM_029987                                                  | Rpe65              | retinal pigment epithelium 65                                      | <b>2.39</b>       |
| 100039246 | NM_001270503,NM_001270503_dup1,<br>NM_001270503_dup2       | Plac9b             | placenta specific 9b                                               | <b>3.69</b>       |
| 100042493 | NM_011335,NM_011335_dup1,<br>NM_011335_dup2,NM_011335_dup3 | Ccl21b             | chemokine (C-C motif) ligand 21B (leucine)                         | <b>1488.63</b>    |
| 56838     | NM_020279                                                  | Ccl28              | chemokine (C-C motif) ligand 28                                    | <b>2.22</b>       |
| 230099    | NM_139305                                                  | Car9               | carbonic anhydrase 9                                               | <b>2.09</b>       |
| 12854     | NM_007745                                                  | Cort               | cortistatin                                                        | <b>2.09</b>       |

|           |                                                                          |               |                                                 |               |
|-----------|--------------------------------------------------------------------------|---------------|-------------------------------------------------|---------------|
| 12517     | NM_001110320,NM_001110321,<br>NM_001110322,NM_007654                     | Cd72          | CD72 antigen                                    | <b>2.02</b>   |
| 75512     | NM_145451                                                                | Gpx6          | glutathione peroxidase 6                        | <b>2.53</b>   |
| 69453     | NM_027084                                                                | Prss56        | protease, serine 56                             | <b>3.71</b>   |
| 100642166 | NR_040366                                                                | Gm15446       | predicted gene 15446                            | <b>51.66</b>  |
| 574437    | NM_001081643                                                             | Xlr3b         | X-linked lymphocyte-regulated 3B                | <b>3.21</b>   |
| 100042539 | NR_033506                                                                | Gm3893        | predicted gene 3893                             | <b>7.22</b>   |
| 383619    | NM_001013779                                                             | Aim2          | absent in melanoma 2                            | <b>3.29</b>   |
| 545611    | NM_001085530,NM_001085530_dup1,<br>NM_001085530_dup2                     | Fam205a2      | family with sequence similarity 205, member A2  | <b>2.46</b>   |
| 105940408 | NM_001309847,NM_001309848                                                | Synj2bp-cox16 | Synj2bp-cox16 readthrough                       | <b>2.07</b>   |
| 108816    | NR_033123,NR_033123_dup1                                                 | 4933409K07Rik | RIKEN cDNA 4933409K07 gene                      | <b>2.95</b>   |
| 15930     | NM_001293690,NM_008324                                                   | Ido1          | indoleamine 2,3-dioxygenase 1                   | <b>3.46</b>   |
| 71355     | NM_001317733,NM_027770                                                   | Col24a1       | collagen, type XXIV, alpha 1                    | <b>2.01</b>   |
| 229599    | NM_001033302                                                             | Ciart         | circadian associated repressor of transcription | <b>2.44</b>   |
| 100503605 | NM_001201391                                                             | Hbb-bs        | hemoglobin, beta adult s chain                  | <b>401.60</b> |
| 51800     | NM_016778                                                                | Bok           | BCL2-related ovarian killer                     | <b>2.04</b>   |
| 52589     | NM_001170866,NM_001170867,<br>NM_001170868,NM_134094                     | Ncald         | neurocalcin delta                               | <b>4.51</b>   |
| 20610     | NM_001301671,NM_001301672,NM_001301673,<br>NM_019929,NR_125903,NR_125904 | Sumo3         | small ubiquitin-like modifier 3                 | <b>2.53</b>   |

**Table S2 Common down-regulated genes in the striatum of drug naïve Per2 KO/WT mice**

| Gene_ID   | Transcript_ID                                                                                                                             | Gene_Symbol   | Gene title                                                                               | Mean fold change   |
|-----------|-------------------------------------------------------------------------------------------------------------------------------------------|---------------|------------------------------------------------------------------------------------------|--------------------|
| 109959    | NM_001042711,NM_001042711_dup1,NM_001042711_dup2,<br>NM_001042711_dup3                                                                    | Amy2a5        | amylase 2a5                                                                              | <b>-129.85</b>     |
| 667705    | NR_033499                                                                                                                                 | Gm8773        | predicted gene 8773                                                                      | <b>-2.99</b>       |
| 723862    | NR_029913                                                                                                                                 | Mir409        | microRNA 409                                                                             | <b>-2.31</b>       |
| 78252     | NM_030069                                                                                                                                 | Nxpe2         | neurexophilin and PC-esterase domain family,<br>member 2                                 | <b>-2.44</b>       |
| 230718    | NM_001085502                                                                                                                              | Nt5c1a        | 5'-nucleotidase, cytosolic IA                                                            | <b>-2.06</b>       |
| 21419     | NM_001025305,NM_001286340,NM_009334                                                                                                       | Tfap2b        | transcription factor AP-2 beta                                                           | <b>-2.24</b>       |
| 100041678 | NM_001256886,NM_001256886_dup1                                                                                                            | Gm3500        | predicted gene 3500                                                                      | <b>-1983616.81</b> |
| 18390     | NM_001039652,NM_001302793,NM_001302794,NM_001302795,<br>NM_001302796,NM_001304937,NM_001304938,NM_001304948,<br>NM_001304950,NM_001304955 | Oprm1         | opioid receptor, mu 1                                                                    | <b>-3.33</b>       |
| 100503044 | NR_036456,NR_036457,NR_036458                                                                                                             | A730020M07Rik | RIKEN cDNA A730020M07 gene                                                               | <b>-2.29</b>       |
| 14613     | NM_001271628,NM_008121                                                                                                                    | Gja5          | gap junction protein, alpha 5                                                            | <b>-2.23</b>       |
| 100041546 | NM_001099217                                                                                                                              | Ly6c2         | lymphocyte antigen 6 complex, locus C2                                                   | <b>-2910325.28</b> |
| 12409     | NM_007621                                                                                                                                 | Cbr2          | carbonyl reductase 2                                                                     | <b>-2.20</b>       |
| 20715     | NM_009251                                                                                                                                 | Serpina3g     | serine (or cysteine) peptidase inhibitor, clade<br>A, member 3G                          | <b>-3.21</b>       |
| 791299    | NR_028592,NR_028593                                                                                                                       | Gm10069       | predicted gene 10069                                                                     | <b>-2.02</b>       |
| 209743    | NM_153509                                                                                                                                 | AF529169      | cDNA sequence AF529169                                                                   | <b>-2.62</b>       |
| 19217     | NM_008964                                                                                                                                 | Ptger2        | prostaglandin E receptor 2 (subtype EP2)                                                 | <b>-2.45</b>       |
| 16371     | NM_010573                                                                                                                                 | Irx1          | Iroquois related homeobox 1 (Drosophila)                                                 | <b>-2.23</b>       |
| 243764    | NM_203491                                                                                                                                 | Chrm2         | cholinergic receptor, muscarinic 2, cardiac                                              | <b>-2.26</b>       |
| 96875     | NM_001110146,NM_021400                                                                                                                    | Prg4          | proteoglycan 4 (megakaryocyte stimulating<br>factor, articular superficial zone protein) | <b>-6.09</b>       |
| 434784    | NM_001018087                                                                                                                              | Ldoc1         | leucine zipper, down-regulated in cancer 1                                               | <b>-2.18</b>       |
| 77057     | NM_029858                                                                                                                                 | Ston1         | stonin 1                                                                                 | <b>-2.00</b>       |
| 15564     | NM_010483                                                                                                                                 | Htr5b         | 5-hydroxytryptamine (serotonin) receptor 5B                                              | <b>-2.32</b>       |
| 107585    | NM_172119                                                                                                                                 | Dio3          | deiodinase, iodothyronine type III                                                       | <b>-2.37</b>       |

|           |                          |          |                                                                       |               |
|-----------|--------------------------|----------|-----------------------------------------------------------------------|---------------|
| 171531    | NM_053015                | Mlph     | melanophilin                                                          | <b>-2.34</b>  |
| 76905     | NM_029796                | Lrg1     | leucine-rich alpha-2-glycoprotein 1                                   | <b>-4.82</b>  |
| 94284     | NM_145079                | Ugt1a6a  | UDP glucuronosyltransferase 1 family, polypeptide A6A                 | <b>-4.02</b>  |
| 620292    | NM_001081653             | Cntnap5c | contactin associated protein-like 5C                                  | <b>-2.30</b>  |
| 268958    | NM_001013767             | Capn11   | calpain 11                                                            | <b>-7.38</b>  |
| 330953    | NM_001081192             | Hcn4     | hyperpolarization-activated, cyclic nucleotide-gated K <sup>+</sup> 4 | <b>-2.45</b>  |
| 223604    | NM_001033876             | Kcnk9    | potassium channel, subfamily K, member 9                              | <b>-2.23</b>  |
| 381884    | NM_001324535             | Slc6a16  | solute carrier family 6, member 16                                    | <b>-2.00</b>  |
| 224224    | NM_174876                | Impg2    | interphotoreceptor matrix proteoglycan 2                              | <b>-2.12</b>  |
| 110834    | NM_145129                | Chrna3   | cholinergic receptor, nicotinic, alpha polypeptide 3                  | <b>-2.67</b>  |
| 12224     | NM_009769                | Klf5     | Kruppel-like factor 5                                                 | <b>-2.07</b>  |
| 243385    | NM_183183                | Gprin3   | GPRIN family member 3                                                 | <b>-2.09</b>  |
| 12895     | NM_009948                | Cpt1b    | carnitine palmitoyltransferase 1b, muscle                             | <b>-2.04</b>  |
| 636808    | NM_001077425             | Cntnap5a | contactin associated protein-like 5A                                  | <b>-2.12</b>  |
| 15551     | NM_010482                | Htr1b    | 5-hydroxytryptamine (serotonin) receptor 1B                           | <b>-2.65</b>  |
| 16819     | NM_008491                | Lcn2     | lipocalin 2                                                           | <b>-34.51</b> |
| 102466257 | NR_106194                | Mir8114  | microRNA 8114                                                         | <b>-15.04</b> |
| 242662    | NM_182929                | Rims3    | regulating synaptic membrane exocytosis 3                             | <b>-2.04</b>  |
| 17219     | NM_001313695,NM_008567   | Mcm6     | minichromosome maintenance complex component 6                        | <b>-3.76</b>  |
| 13654     | NM_001347458,NM_010118   | Egr2     | early growth response 2                                               | <b>-2.30</b>  |
| 20508     | NM_021712                | Slc18a3  | solute carrier family 18 (vesicular monoamine), member 3              | <b>-2.06</b>  |
| 98314     | NM_001310767,NM_178882   | D2hgdh   | D-2-hydroxyglutarate dehydrogenase                                    | <b>-3.42</b>  |
| 15122     | NM_008218,NM_008218_dup1 | Hba-a1   | hemoglobin alpha, adult chain 1                                       | <b>-9.69</b>  |
| 13844     | NM_001290753,NM_010142   | Ephb2    | Eph receptor B2                                                       | <b>-2.10</b>  |
| 63993     | NM_022025                | Slc5a7   | solute carrier family 5 (choline transporter), member 7               | <b>-2.06</b>  |

|           |                                                  |             |                                                                               |                 |
|-----------|--------------------------------------------------|-------------|-------------------------------------------------------------------------------|-----------------|
| 12398     | NM_001109873,NM_009824,NM_177289                 | Cbfa2t3     | core-binding factor, runt domain, alpha subunit 2, translocated to, 3 (human) | <b>-2.18</b>    |
| 241915    | NM_001165954,NM_001165955,NM_001165956,NM_153421 | Phc3        | polyhomeotic-like 3 (Drosophila)                                              | <b>-7.46</b>    |
| 14395     | NM_008066                                        | Gabra2      | gamma-aminobutyric acid (GABA) A receptor, subunit alpha 2                    | <b>-2.11</b>    |
| 69368     | NM_001111279,NM_027057                           | Wdfy1       | WD repeat and FYVE domain containing 1                                        | <b>-2.09</b>    |
| 18708     | NM_001024955,NM_001077495                        | Pik3r1      | phosphatidylinositol 3-kinase, regulatory subunit, polypeptide 1 (p85 alpha)  | <b>-5.27</b>    |
| 56216     | NM_024414                                        | Stx1b       | syntaxin 1B                                                                   | <b>-2.01</b>    |
| 21888     | NM_001302947,NM_001302950,NM_001302951,NM_011600 | Tle4        | transducin-like enhancer of split 4                                           | <b>-3.10</b>    |
| 67886     | NM_001081360,NM_001347109,NM_001347110           | Camsap2     | calmodulin regulated spectrin-associated protein family, member 2             | <b>-3.33</b>    |
| 100039636 | NR_037854                                        | Atp6v0c-ps2 | ATPase, H <sup>+</sup> transporting, lysosomal V0 subunit C, pseudogene 2     | <b>-4117.93</b> |
| 547127    | NR_033520                                        | Tmem181b-ps | transmembrane protein 181B, pseudogene                                        | <b>-2.01</b>    |

**Table S3 Common up-regulated genes in the striatum of Per2 KO mice before/after METH treatment**

| Gene_ID       | Transcript_ID                       | Gene_Symbol       | Gene title                                                                            | Mean fold change       |
|---------------|-------------------------------------|-------------------|---------------------------------------------------------------------------------------|------------------------|
| 21419         | NM_001025305,NM_001286340,NM_009334 | Tfap2b            | transcription factor AP-2 beta                                                        | <b>3.53</b>            |
| 380755        | NM_001033437                        | Lsmem1            | leucine-rich single-pass membrane protein 1                                           | <b>3.51</b>            |
| 15442         | NM_152803                           | Hpse              | heparanase                                                                            | <b>2.69</b>            |
| 27356         | NM_013754                           | Insl6             | insulin-like 6                                                                        | <b>2.43</b>            |
| 668257        | NM_001114084                        | Dgat2l6           | diacylglycerol O-acyltransferase 2-like 6                                             | <b>2.95</b>            |
| 14234         | NM_013519                           | Foxc2             | forkhead box C2                                                                       | <b>4.28</b>            |
| 27047         | NM_012050                           | Omd               | osteomodulin                                                                          | <b>2.85</b>            |
| 12642         | NM_009890                           | Ch25h             | cholesterol 25-hydroxylase                                                            | <b>3.35</b>            |
| 66991         | NM_001311106,NM_025890              | Khdc3             | KH domain containing 3, subcortical maternal complex member                           | <b>2.92</b>            |
| 223272        | NM_145467                           | Itgbl1            | integrin, beta-like 1                                                                 | <b>2.72</b>            |
| 14181         | NM_001271616,NM_008009              | Egfbp1            | fibroblast growth factor binding protein 1                                            | <b>2.57</b>            |
| 14012         | NM_007962                           | Mpzl2             | myelin protein zero-like 2                                                            | <b>3.20</b>            |
| 10004154<br>6 | NM_001099217                        | Ly6c2             | lymphocyte antigen 6 complex, locus C2                                                | <b>2021261.6<br/>1</b> |
| 12409         | NM_007621                           | Cbr2              | carbonyl reductase 2                                                                  | <b>2.18</b>            |
| 10050385<br>9 | NR_045272                           | 1110015O18Ri<br>k | RIKEN cDNA 1110015O18 gene                                                            | <b>2.42</b>            |
| 74165         | NM_175206                           | Fbxl22            | F-box and leucine-rich repeat protein 22                                              | <b>2.56</b>            |
| 22420         | NM_009526                           | Wnt6              | wingless-type MMTV integration site family, member 6                                  | <b>3.54</b>            |
| 14962         | NM_001142706,NM_008198              | Cfb               | complement factor B                                                                   | <b>3.18</b>            |
| 208164        | NM_173375                           | Fam180a           | family with sequence similarity 180, member A                                         | <b>2.87</b>            |
| 11498         | NM_009620                           | Adam4             | a disintegrin and metallopeptidase domain 4                                           | <b>2.12</b>            |
| 78906         | NM_030218                           | Misp              | mitotic spindle positioning                                                           | <b>2.15</b>            |
| 67356         | NM_026104                           | Tmco5             | transmembrane and coiled-coil domains 5                                               | <b>2.24</b>            |
| 231162        | NM_001081106                        | Cyt11             | cytokine-like 1                                                                       | <b>3.14</b>            |
| 96875         | NM_001110146,NM_021400              | Prg4              | proteoglycan 4 (megakaryocyte stimulating factor, articular superficial zone protein) | <b>7.19</b>            |

|               |                                                  |                   |                                                                          |              |
|---------------|--------------------------------------------------|-------------------|--------------------------------------------------------------------------|--------------|
| 50501         | NM_001037539,NM_001170419,NM_015768              | Prok2             | prokineticin 2                                                           | <b>4.85</b>  |
| 12797         | NM_009922                                        | Cnn1              | calponin 1                                                               | <b>2.82</b>  |
| 14190         | NM_008013                                        | Fgl2              | fibrinogen-like protein 2                                                | <b>2.48</b>  |
| 112418        | NM_053216                                        | 1700102P08Ri<br>k | RIKEN cDNA 1700102P08 gene                                               | <b>2.12</b>  |
| 10000960<br>0 | NM_001103168                                     | Zglp1             | zinc finger, GATA-like protein 1                                         | <b>2.53</b>  |
| 246728        | NM_001347448,NM_145227                           | Oas2              | 2'-5' oligoadenylate synthetase 2                                        | <b>2.47</b>  |
| 78772         | NM_001308052,NM_030175                           | Hhipl2            | hedgehog interacting protein-like 2                                      | <b>2.27</b>  |
| 17116         | NM_010750                                        | Mab21l1           | mab-21-like 1 (C. elegans)                                               | <b>2.19</b>  |
| 107585        | NM_172119                                        | Dio3              | deiodinase, iodothyronine type III                                       | <b>2.74</b>  |
| 76905         | NM_029796                                        | Lrg1              | leucine-rich alpha-2-glycoprotein 1                                      | <b>10.03</b> |
| 17133         | NM_001304830,NM_001304831,NM_001304832,NM_010755 | Maff              | v-maf musculoaponeurotic fibrosarcoma oncogene family, protein F (avian) | <b>2.36</b>  |
| 268958        | NM_001013767                                     | Capn11            | calpain 11                                                               | <b>12.12</b> |
| 11705         | NM_007445                                        | Amh               | anti-Mullerian hormone                                                   | <b>2.18</b>  |
| 71275         | NM_027744                                        | Noxred1           | NADP+ dependent oxidoreductase domain containing 1                       | <b>2.12</b>  |
| 224224        | NM_174876                                        | Impg2             | interphotoreceptor matrix proteoglycan 2                                 | <b>2.70</b>  |
| 71712         | NM_027878                                        | Dram1             | DNA-damage regulated autophagy modulator 1                               | <b>2.12</b>  |
| 23850         | NM_001085376                                     | Pappa2            | pappalysin 2                                                             | <b>3.05</b>  |
| 229214        | NM_198192                                        | Qrfpr             | pyroglutamylated RFamide peptide receptor                                | <b>4.09</b>  |
| 213393        | NM_001166580,NM_145980                           | 8430408G22Ri<br>k | RIKEN cDNA 8430408G22 gene                                               | <b>3.51</b>  |
| 18399         | NM_008766                                        | Slc22a6           | solute carrier family 22 (organic anion transporter), member 6           | <b>2.37</b>  |
| 12224         | NM_009769                                        | Klf5              | Kruppel-like factor 5                                                    | <b>2.03</b>  |
| 14573         | NM_001301332,NM_001301333,NM_001301357,NM_010275 | Gdnf              | glial cell line derived neurotrophic factor                              | <b>2.01</b>  |
| 22445         | NM_001110784                                     | Xlr3a             | X-linked lymphocyte-regulated 3A                                         | <b>2.08</b>  |
| 226040        | NM_183160                                        | Tmem252           | transmembrane protein 252                                                | <b>5.52</b>  |
| 15562         | NM_008313                                        | Htr4              | 5 hydroxytryptamine (serotonin) receptor 4                               | <b>3.02</b>  |
| 93705         | NM_033580                                        | Pcdhgb8           | protocadherin gamma subfamily B, 8                                       | <b>3.73</b>  |



|               |                                                                            |          |                                                                     |              |
|---------------|----------------------------------------------------------------------------|----------|---------------------------------------------------------------------|--------------|
| 107770        | NM_001293795,NM_181540                                                     | Tm6sf2   | transmembrane 6 superfamily member 2                                | <b>2.79</b>  |
| 16819         | NM_008491                                                                  | Lcn2     | lipocalin 2                                                         | <b>56.14</b> |
| 10050442<br>5 | NR_130128                                                                  | Gm20219  | predicted gene, 20219                                               | <b>2.28</b>  |
| 10246625<br>7 | NR_106194                                                                  | Mir8114  | microRNA 8114                                                       | <b>11.36</b> |
| 18295         | NM_008760                                                                  | Ogn      | osteoglycin                                                         | <b>2.17</b>  |
| 85030         | NM_001291010,NM_033042                                                     | Tnfrsf25 | tumor necrosis factor receptor superfamily, member 25               | <b>2.34</b>  |
| 12918         | NM_205769                                                                  | Crh      | corticotropin releasing hormone                                     | <b>2.31</b>  |
| 18768         | NM_001039050,NM_001039051,NM_001039052,NM_001039053,NM_001190402,NM_008863 | Pkib     | protein kinase inhibitor beta, cAMP dependent, testis specific      | <b>2.02</b>  |
| 229357        | NM_177346                                                                  | Gpr149   | G protein-coupled receptor 149                                      | <b>2.87</b>  |
| 13654         | NM_001347458,NM_010118                                                     | Egr2     | early growth response 2                                             | <b>6.45</b>  |
| 22413         | NM_023653                                                                  | Wnt2     | wingless-type MMTV integration site family, member 2                | <b>2.18</b>  |
| 66705         | NM_025718                                                                  | Dnase1l2 | deoxyribonuclease 1-like 2                                          | <b>2.10</b>  |
| 14264         | NM_021355                                                                  | Fmod     | fibromodulin                                                        | <b>2.96</b>  |
| 15511         | NM_010478                                                                  | Hspa1b   | heat shock protein 1B                                               | <b>2.04</b>  |
| 230162        | NM_001289901,NM_145547                                                     | Zfp189   | zinc finger protein 189                                             | <b>2.18</b>  |
| 14282         | NM_001347586,NM_008036                                                     | Fosb     | FBJ osteosarcoma oncogene B                                         | <b>2.49</b>  |
| 15122         | NM_008218,NM_008218_dup1                                                   | Hba-a1   | hemoglobin alpha, adult chain 1                                     | <b>16.46</b> |
| 16598         | NM_008452                                                                  | Klf2     | Kruppel-like factor 2 (lung)                                        | <b>2.60</b>  |
| 27220         | NM_001081493,NM_013732                                                     | Cartpt   | CART prepropeptide                                                  | <b>2.67</b>  |
| 14281         | NM_010234                                                                  | Fos      | FBJ osteosarcoma oncogene                                           | <b>4.26</b>  |
| 16493         | NM_145983                                                                  | Kcna5    | potassium voltage-gated channel, shaker-related subfamily, member 5 | <b>2.25</b>  |
| 18124         | NM_001307989,NM_015743                                                     | Nr4a3    | nuclear receptor subfamily 4, group A, member 3                     | <b>2.37</b>  |
| 241915        | NM_001165954,NM_001165955,NM_001165956,NM_153421                           | Phc3     | polyhomeotic-like 3 (Drosophila)                                    | <b>12.62</b> |
| 14284         | NM_008037                                                                  | Fosl2    | fos-like antigen 2                                                  | <b>3.19</b>  |
| 13656         | NM_020596                                                                  | Egr4     | early growth response 4                                             | <b>2.00</b>  |
| 268354        | NM_001252387,NM_182807,NR_045514                                           | Fam19a2  | family with sequence similarity 19, member A2                       | <b>2.49</b>  |
| 21888         | NM_001302947,NM_001302950,NM_001302951,NM_011600                           | Tle4     | transducin-like enhancer of split 4                                 | <b>3.09</b>  |

|        |                                                                            |         |                                                                                          |             |
|--------|----------------------------------------------------------------------------|---------|------------------------------------------------------------------------------------------|-------------|
| 18627  | NM_011066                                                                  | Per2    | period circadian clock 2                                                                 | <b>2.01</b> |
| 16477  | NM_008416                                                                  | Junb    | jun B proto-oncogene                                                                     | <b>2.67</b> |
| 67886  | NM_001081360,NM_001347109,NM_001347110                                     | Camsap2 | calmodulin regulated spectrin-associated protein family, member 2                        | <b>3.21</b> |
| 15370  | NM_010444                                                                  | Nr4a1   | nuclear receptor subfamily 4, group A, member 1                                          | <b>2.45</b> |
| 83762  | NM_001100395,NM_001286421,NM_001313767,NM_031875                           | Otof    | otoferlin                                                                                | <b>3.23</b> |
| 18610  | NM_001286502,NM_018863                                                     | Pdyn    | prodynorphin                                                                             | <b>2.24</b> |
| 20393  | NM_001161845,NM_001161847,NM_001161848,NM_001161849,NM_001161850,NM_011361 | Sgk1    | serum/glucocorticoid regulated kinase 1                                                  | <b>2.47</b> |
| 11838  | NM_001276684,NM_018790                                                     | Arc     | activity regulated cytoskeletal-associated protein                                       | <b>2.11</b> |
| 21333  | NM_001311060,NM_009311                                                     | Tac1    | tachykinin 1                                                                             | <b>2.16</b> |
| 22393  | NM_011716                                                                  | Wfs1    | Wolfram syndrome 1 homolog (human)                                                       | <b>2.40</b> |
| 241638 | NM_001291027,NM_001291028,NM_197945                                        | Lzts3   | leucine zipper, putative tumor suppressor family member 3                                | <b>2.57</b> |
| 13653  | NM_007913                                                                  | Egr1    | early growth response 1                                                                  | <b>2.30</b> |
| 22631  | NM_001253805,NM_001253806,NM_001253807,NM_011740                           | Ywhaz   | tyrosine 3-monooxygenase/tryptophan 5-monooxygenase activation protein, zeta polypeptide | <b>2.48</b> |

**Table S4 Common down-regulated genes in the striatum of Per2 KO mice before/after METH treatment**

| <b>Gene_ID</b> | <b>Transcript_ID</b>                                          | <b>Gene_Symbol</b> | <b>Gene title</b>                                     | <b>Mean fold change</b> |
|----------------|---------------------------------------------------------------|--------------------|-------------------------------------------------------|-------------------------|
| 100038732      | NR_126070,NR_126071                                           | Gm11681            | predicted gene 11681                                  | <b>-3.66</b>            |
| 19696          | NM_009044                                                     | Rel                | reticuloendotheliosis oncogene                        | <b>-2.32</b>            |
| 546886         | NM_001195094                                                  | Cfap73             | cilia and flagella associated protein 73              | <b>-2.91</b>            |
| 13394          | NM_007867                                                     | Dlx4               | distal-less homeobox 4                                | <b>-3.82</b>            |
| 102634678      | NR_110445                                                     | Haglr              | Hoxd antisense growth associated long non-coding RNA  | <b>-3.27</b>            |
| 16665          | NM_008469                                                     | Krt15              | keratin 15                                            | <b>-9.01</b>            |
| 72609          | NR_046019                                                     | 2700070H01Rik      | RIKEN cDNA 2700070H01 gene                            | <b>-2.95</b>            |
| 16621          | NM_008455                                                     | Klkb1              | kallikrein B, plasma 1                                | <b>-2.89</b>            |
| 20299          | NM_009137                                                     | Ccl22              | chemokine (C-C motif) ligand 22                       | <b>-3.40</b>            |
| 381229         | NM_001163267                                                  | Cfap58             | cilia and flagella associated protein 58              | <b>-2.41</b>            |
| 625237         | NR_136901                                                     | Gm6566             | predicted gene 6566                                   | <b>-3.63</b>            |
| 56226          | NM_019585,NM_207687,NM_207688,NM_207689,NM_207690,NM_207691   | Espn               | espin                                                 | <b>-3.07</b>            |
| 71236          | NM_001163533,NM_001163534,NM_001163535,NM_027730              | Rsph14             | radial spoke head homolog 14 (Chlamydomonas)          | <b>-3.90</b>            |
| 74629          | NR_024323                                                     | 4930426L09Rik      | RIKEN cDNA 4930426L09 gene                            | <b>-2.09</b>            |
| 76571          | NM_001289554,NM_001289555,NM_001289556,NM_001289557,NM_029659 | Styx11             | serine/threonine/tyrosine interacting-like 1          | <b>-4.89</b>            |
| 100042948      | NR_030670                                                     | Gm15760            | predicted gene 15760                                  | <b>-3.47</b>            |
| 69987          | NM_027283                                                     | Spaca9             | sperm acrosome associated 9                           | <b>-5.07</b>            |
| 329093         | NM_001289497,NM_177834                                        | Cpa6               | carboxypeptidase A6                                   | <b>-3.82</b>            |
| 100045792      | NM_001195036                                                  | Ect2l              | epithelial cell transforming sequence 2 oncogene-like | <b>-2.78</b>            |
| 654796         | NR_015562                                                     | 9530036O11Rik      | RIKEN cDNA 9530036O11Rik                              | <b>-2.18</b>            |
| 434756         | NM_001033785                                                  | Akap14             | A kinase (PRKA) anchor protein 14                     | <b>-4.34</b>            |
| 67747          | NM_026357                                                     | Ribc2              | RIB43A domain with coiled-coils 2                     | <b>-2.95</b>            |
| 16373          | NM_001253822,NM_008393                                        | Irx3               | Iroquois related homeobox 3                           | <b>-3.26</b>            |
| 74597          | NR_015506                                                     | 4833418N02Rik      | RIKEN cDNA 4833418N02 gene                            | <b>-2.55</b>            |
| 192212         | NM_138750,NM_178047                                           | Prom2              | prominin 2                                            | <b>-4.29</b>            |
| 15439          | NM_001329965,NM_017370                                        | Hp                 | haptoglobin                                           | <b>-3.07</b>            |

|           |                                                     |               |                                                                                               |              |
|-----------|-----------------------------------------------------|---------------|-----------------------------------------------------------------------------------------------|--------------|
| 74107     | NM_001164362,NM_028293,NM_028760                    | Cep55         | centrosomal protein 55                                                                        | <b>-2.93</b> |
| 66611     | NM_025660                                           | Ribc1         | RIB43A domain with coiled-coils 1                                                             | <b>-2.89</b> |
| 14842     | NM_008178                                           | Gsx1          | GS homeobox 1                                                                                 | <b>-2.28</b> |
| 75951     | NR_045991                                           | 4930578M01Rik | RIKEN cDNA 4930578M01 gene                                                                    | <b>-2.31</b> |
| 60594     | NM_001110807                                        | Capn12        | calpain 12                                                                                    | <b>-2.28</b> |
| 12869     | NM_007751                                           | Cox8b         | cytochrome c oxidase subunit VIIIb                                                            | <b>-2.72</b> |
| 380660    | NM_001142804,NM_198636                              | Acss3         | acyl-CoA synthetase short-chain family member 3                                               | <b>-5.39</b> |
| 109212    | NM_144526                                           | Fam64a        | family with sequence similarity 64, member A                                                  | <b>-2.24</b> |
| 110895    | NM_177084                                           | Slc9a4        | solute carrier family 9 (sodium/hydrogen exchanger), member 4                                 | <b>-8.54</b> |
| 108153    | NM_001003911,NM_001311115,NM_001326294,NM_001326351 | Adamts7       | a disintegrin-like and metallopeptidase (reprolysin type) with thrombospondin type 1 motif, 7 | <b>-3.10</b> |
| 114654    | NM_033478                                           | Ly6g6d        | lymphocyte antigen 6 complex, locus G6D                                                       | <b>-2.25</b> |
| 67968     | NM_026480                                           | Ooep          | oocyte expressed protein                                                                      | <b>-2.73</b> |
| 71200     | NM_027717                                           | Dydc2         | DPY30 domain containing 2                                                                     | <b>-2.29</b> |
| 100502734 | NR_040441                                           | Gm16023       | predicted gene 16023                                                                          | <b>-2.06</b> |
| 213234    | NM_001310529,NM_172515                              | Zbbx          | zinc finger, B-box domain containing                                                          | <b>-2.76</b> |
| 76937     | NR_015522                                           | 2810429I04Rik | RIKEN cDNA 2810429I04 gene                                                                    | <b>-2.04</b> |
| 242484    | NM_178727                                           | D630039A03Rik | RIKEN cDNA D630039A03 gene                                                                    | <b>-3.00</b> |
| 18491     | NM_021362                                           | Pappa         | pregnancy-associated plasma protein A                                                         | <b>-2.53</b> |
| 217356    | NM_001195088,NM_001195089,NM_001195090,NM_181856    | Tmc8          | transmembrane channel-like gene family 8                                                      | <b>-3.26</b> |
| 75573     | NM_029345                                           | Prr29         | proline rich 29                                                                               | <b>-4.20</b> |
| 20521     | NM_009203                                           | Slc22a12      | solute carrier family 22 (organic anion/cation transporter), member 12                        | <b>-3.52</b> |
| 329375    | NM_001166705                                        | Cfap77        | cilia and flagella associated protein 77                                                      | <b>-2.62</b> |
| 80910     | NM_030720                                           | Gpr84         | G protein-coupled receptor 84                                                                 | <b>-2.47</b> |
| 104158    | NM_053200                                           | Ces1d         | carboxylesterase 1D                                                                           | <b>-2.96</b> |
| 22423     | NM_011720                                           | Wnt8b         | wingless-type MMTV integration site family, member 8B                                         | <b>-3.43</b> |
| 74890     | NM_001347456,NM_029112                              | Morn3         | MORN repeat containing 3                                                                      | <b>-4.02</b> |
| 216799    | NM_145827                                           | Nlrp3         | NLR family, pyrin domain containing 3                                                         | <b>-2.02</b> |
| 629750    | NR_033523                                           | Gm11517       | predicted gene 11517                                                                          | <b>-2.08</b> |

|           |                                                  |               |                                                            |              |
|-----------|--------------------------------------------------|---------------|------------------------------------------------------------|--------------|
| 67085     | NM_001034037                                     | 1700024G13Rik | RIKEN cDNA 1700024G13 gene                                 | <b>-3.52</b> |
| 13611     | NM_010102                                        | S1pr4         | sphingosine-1-phosphate receptor 4                         | <b>-2.13</b> |
| 623534    | NM_001165957                                     | Nme9          | NME/NM23 family member 9                                   | <b>-4.14</b> |
| 433099    | NM_001163192                                     | Ly6g6f        | lymphocyte antigen 6 complex, locus G6F                    | <b>-2.92</b> |
| 100504191 | NR_045069                                        | Gm16576       | predicted gene 16576                                       | <b>-2.74</b> |
| 56622     | NM_020330                                        | Adam21        | a disintegrin and metallopeptidase domain 21               | <b>-2.34</b> |
| 67344     | NM_001163767,NM_001163768,NM_026100              | Tctex1d1      | Tctex1 domain containing 1                                 | <b>-2.26</b> |
| 71827     | NM_027941                                        | Lrrc34        | leucine rich repeat containing 34                          | <b>-2.83</b> |
| 57355     | NM_001040700                                     | BC051019      | cDNA sequence BC051019                                     | <b>-3.17</b> |
| 171209    | NM_001310474,NM_183000                           | Asic3         | acid-sensing (proton-gated) ion channel 3                  | <b>-2.18</b> |
| 73472     | NM_178387                                        | Spata18       | spermatogenesis associated 18                              | <b>-4.20</b> |
| 237362    | NM_001177511                                     | Npffr1        | neuropeptide FF receptor 1                                 | <b>-2.94</b> |
| 67430     | NM_026150                                        | 4921536K21Rik | RIKEN cDNA 4921536K21 gene                                 | <b>-2.38</b> |
| 414066    | NR_028266                                        | BC037032      | cDNA Sequence BC037032                                     | <b>-2.09</b> |
| 11752     | NM_001281845,NM_013473                           | Anxa8         | annexin A8                                                 | <b>-3.74</b> |
| 211482    | NM_172497                                        | Efhb          | EF hand domain family, member B                            | <b>-5.01</b> |
| 73301     | NM_183096                                        | Ttc29         | tetratricopeptide repeat domain 29                         | <b>-3.51</b> |
| 433481    | NR_136884                                        | Gm5535        | predicted gene 5535                                        | <b>-2.26</b> |
| 72813     | NR_029441                                        | 2810454H06Rik | RIKEN cDNA 2810454H06 gene                                 | <b>-3.58</b> |
| 13524     | NM_010084,NR_136908                              | Adam18        | a disintegrin and metallopeptidase domain 18               | <b>-2.31</b> |
| 229277    | NM_153156                                        | Stoml3        | stomatin (Epb7.2)-like 3                                   | <b>-4.50</b> |
| 105500046 | NR_131335                                        | Gm30731       | predicted gene, 30731                                      | <b>-2.15</b> |
| 69797     | NR_028123                                        | 1600029I14Rik | RIKEN cDNA 1600029I14 gene                                 | <b>-3.25</b> |
| 64654     | NM_022657                                        | Fgf23         | fibroblast growth factor 23                                | <b>-2.08</b> |
| 68527     | NM_001113558,NM_001165932,NM_001311208,NM_026754 | Ucma          | upper zone of growth plate and cartilage matrix associated | <b>-3.85</b> |
| 235345    | NM_177702                                        | 4833427G06Rik | RIKEN cDNA 4833427G06 gene                                 | <b>-4.30</b> |
| 68612     | NM_026785                                        | Ube2c         | ubiquitin-conjugating enzyme E2C                           | <b>-2.51</b> |
| 67483     | NM_026188                                        | 1700028P14Rik | RIKEN cDNA 1700028P14 gene                                 | <b>-2.93</b> |
| 100038374 | NR_040530                                        | Gm10714       | predicted gene 10714                                       | <b>-3.15</b> |
| 21401     | NM_011542                                        | Tcea3         | transcription elongation factor A (SII), 3                 | <b>-2.79</b> |

|           |                                     |               |                                                   |              |
|-----------|-------------------------------------|---------------|---------------------------------------------------|--------------|
| 22262     | NM_009474                           | Uox           | urate oxidase                                     | <b>-3.35</b> |
| 14652     | NM_021332                           | Glp1r         | glucagon-like peptide 1 receptor                  | <b>-5.28</b> |
| 268697    | NM_172301                           | Ccnb1         | cyclin B1                                         | <b>-2.98</b> |
| 19348     | NM_001166406,NM_001166407,NM_009004 | Kif20a        | kinesin family member 20A                         | <b>-2.03</b> |
| 381693    | NM_029440                           | Wdr95         | WD40 repeat domain 95                             | <b>-2.90</b> |
| 68270     | NM_026648                           | Dnaaf1        | dynein, axonemal assembly factor 1                | <b>-2.61</b> |
| 12534     | NM_007659                           | Cdk1          | cyclin-dependent kinase 1                         | <b>-2.97</b> |
| 100313531 | NR_030769                           | Nkx2-2os      | NK2 homeobox 2, opposite strand                   | <b>-2.92</b> |
| 70054     | NM_027298                           | Ccdc89        | coiled-coil domain containing 89                  | <b>-2.48</b> |
| 242653    | NM_001038590,NM_153105              | Cldn19        | claudin 19                                        | <b>-3.15</b> |
| 632687    | NM_001039242,NM_172568              | March10       | membrane-associated ring finger (C3HC4) 10        | <b>-2.21</b> |
| 100271841 | NR_027289,NR_027290                 | Uck1os        | uridine-cytidine kinase 1-like 1, opposite strand | <b>-4.38</b> |
| 74453     | NM_028948,NR_029424                 | Cfap53        | cilia and flagella associated protein 53          | <b>-3.76</b> |
| 214301    | NM_153076                           | Crygn         | crystallin, gamma N                               | <b>-5.21</b> |
| 80986     | NM_001004140                        | Ckap2         | cytoskeleton associated protein 2                 | <b>-2.22</b> |
| 17285     | NM_010791                           | Meox1         | mesenchyme homeobox 1                             | <b>-2.90</b> |
| 13590     | NM_010094                           | Lefty1        | left right determination factor 1                 | <b>-2.53</b> |
| 21463     | NM_001085555,NM_013687              | Tcp11         | t-complex protein 11                              | <b>-2.15</b> |
| 621239    | NM_001039038                        | Nhlrc4        | NHL repeat containing 4                           | <b>-2.32</b> |
| 18094     | NM_008701                           | Nkx2-9        | NK2 homeobox 9                                    | <b>-2.47</b> |
| 75784     | NM_001024614                        | 1700007G11Rik | RIKEN cDNA 1700007G11 gene                        | <b>-2.50</b> |
| 99542     | NR_040386                           | AI115009      | expressed sequence AI115009                       | <b>-2.20</b> |
| 74978     | NM_001163559,NM_029134              | Lrriq1        | leucine-rich repeats and IQ motif containing 1    | <b>-3.34</b> |
| 404710    | NM_001033484                        | Iqgap3        | IQ motif containing GTPase activating protein 3   | <b>-2.02</b> |
| 237891    | NM_001013759                        | Gas2l2        | growth arrest-specific 2 like 2                   | <b>-4.52</b> |
| 66968     | NM_001077348,NM_025874              | Plin5         | perilipin 5                                       | <b>-2.94</b> |
| 70466     | NM_181589                           | Ckap2l        | cytoskeleton associated protein 2-like            | <b>-2.32</b> |
| 93721     | NM_030703                           | Cpn1          | carboxypeptidase N, polypeptide 1                 | <b>-2.45</b> |
| 54204     | NM_017461                           | Sept1         | septin 1                                          | <b>-2.04</b> |
| 75495     | NM_029309                           | Morn5         | MORN repeat containing 5                          | <b>-2.66</b> |

|           |                                     |               |                                                                      |              |
|-----------|-------------------------------------|---------------|----------------------------------------------------------------------|--------------|
| 338369    | NM_001291042,NM_001291043,NM_177392 | Tmem220       | transmembrane protein 220                                            | <b>-2.43</b> |
| 74934     | NM_001081393                        | Armc4         | armadillo repeat containing 4                                        | <b>-5.78</b> |
| 626359    | NM_001037927                        | Wdr93         | WD repeat domain 93                                                  | <b>-2.38</b> |
| 12372     | NM_009813                           | Casq1         | calsequestrin 1                                                      | <b>-2.26</b> |
| 320118    | NM_001199632,NM_177076              | Fbxl13        | F-box and leucine-rich repeat protein 13                             | <b>-3.13</b> |
| 629016    | NM_001038651                        | Zfp953        | zinc finger protein 953                                              | <b>-2.04</b> |
| 53419     | NM_001122756,NM_016869              | Corin         | corin                                                                | <b>-4.16</b> |
| 14038     | NM_007969                           | Wfdc18        | WAP four-disulfide core domain 18                                    | <b>-2.10</b> |
| 69387     | NM_153527                           | Dnajb13       | DnaJ heat shock protein family (Hsp40) member B13                    | <b>-3.41</b> |
| 170738    | NM_133207                           | Kcnh7         | potassium voltage-gated channel, subfamily H (eag-related), member 7 | <b>-2.18</b> |
| 71149     | NM_027697                           | 4933413G19Rik | RIKEN cDNA 4933413G19 gene                                           | <b>-2.35</b> |
| 80903     | NM_030614                           | Fgf16         | fibroblast growth factor 16                                          | <b>-2.05</b> |
| 13799     | NM_010134                           | En2           | engrailed 2                                                          | <b>-2.83</b> |
| 100043332 | NM_001254953                        | Ankrd66       | ankyrin repeat domain 66                                             | <b>-2.45</b> |
| 227736    | NM_025619                           | Cfap157       | cilia and flagella associated protein 157                            | <b>-2.61</b> |
| 75434     | NM_029285                           | 1700001C02Rik | RIKEN cDNA 1700001C02 gene                                           | <b>-4.70</b> |
| 17279     | NM_010790                           | Melk          | maternal embryonic leucine zipper kinase                             | <b>-2.13</b> |
| 72027     | NM_028064                           | Slc39a4       | solute carrier family 39 (zinc transporter), member 4                | <b>-3.90</b> |
| 234684    | NM_177449                           | Lrrc29        | leucine rich repeat containing 29                                    | <b>-2.05</b> |
| 667742    | NM_001039485                        | Piezo2        | piezo-type mechanosensitive ion channel component 2                  | <b>-2.47</b> |
| 14725     | NM_001081088                        | Lrp2          | low density lipoprotein receptor-related protein 2                   | <b>-2.08</b> |
| 627872    | NM_001252070                        | Dnah7a        | dynein, axonemal, heavy chain 7A                                     | <b>-2.04</b> |
| 14266     | NM_008032                           | Aff2          | AF4/FMR2 family, member 2                                            | <b>-2.27</b> |
| 74387     | NM_001163695,NM_028905              | 4932438H23Rik | RIKEN cDNA 4932438H23 gene                                           | <b>-2.09</b> |
| 94284     | NM_145079                           | Ugt1a6a       | UDP glucuronosyltransferase 1 family, polypeptide A6A                | <b>-3.13</b> |
| 242646    | NM_175030                           | Tctex1d4      | Tctex1 domain containing 4                                           | <b>-3.33</b> |
| 328957    | NR_045400                           | 9330117O12Rik | RIKEN cDNA 9330117O12 gene                                           | <b>-2.39</b> |
| 66758     | NM_025749                           | Zfp474        | zinc finger protein 474                                              | <b>-3.13</b> |
| 403180    | NM_207280                           | Ccdc121       | coiled-coil domain containing 121                                    | <b>-3.13</b> |

|        |                                                     |               |                                                             |                |
|--------|-----------------------------------------------------|---------------|-------------------------------------------------------------|----------------|
| 17079  | NM_008533                                           | Cd180         | CD180 antigen                                               | <b>-2.22</b>   |
| 27375  | NM_001282095,NM_001282096,NM_013769                 | Tjp3          | tight junction protein 3                                    | <b>-3.21</b>   |
| 74354  | NM_028886                                           | Lrguk         | leucine-rich repeats and guanylate kinase domain containing | <b>-3.66</b>   |
| 74362  | NM_028892                                           | Spag17        | sperm associated antigen 17                                 | <b>-5.35</b>   |
| 381741 | NM_001033461,NM_001289821,NM_001289822              | Lrrc43        | leucine rich repeat containing 43                           | <b>-2.61</b>   |
| 217946 | NM_146040                                           | Cdca7l        | cell division cycle associated 7 like                       | <b>-2.01</b>   |
| 65100  | NM_022987                                           | Zic5          | zinc finger protein of the cerebellum 5                     | <b>-3.31</b>   |
| 58207  | NM_021398                                           | Slc43a3       | solute carrier family 43, member 3                          | <b>-2.68</b>   |
| 12266  | NM_009778                                           | C3            | complement component 3                                      | <b>-2.41</b>   |
| 16854  | NM_001145953,NM_010705                              | Lgals3        | lectin, galactose binding, soluble 3                        | <b>-3.24</b>   |
| 330721 | NM_001347318,NM_177898                              | Nek5          | NIMA (never in mitosis gene a)-related expressed kinase 5   | <b>-2.98</b>   |
| 218739 | NM_177624                                           | Sntn          | sentan, cilia apical structure protein                      | <b>-4.69</b>   |
| 69325  | NM_029306                                           | 1700012B09Rik | RIKEN cDNA 1700012B09 gene                                  | <b>-3.44</b>   |
| 433698 | NM_001277167                                        | Fam205a1      | family with sequence similarity 205, member A1              | <b>-888.86</b> |
| 75060  | NR_073374                                           | 4930506C21Rik | RIKEN cDNA 4930506C21 gene                                  | <b>-2.75</b>   |
| 12767  | NM_009911                                           | Cxcr4         | chemokine (C-X-C motif) receptor 4                          | <b>-2.25</b>   |
| 223650 | NM_144848                                           | Eppk1         | epiplakin 1                                                 | <b>-2.29</b>   |
| 74023  | NM_001177900,NM_001303132,NM_023727                 | Rd3           | retinal degeneration 3                                      | <b>-3.13</b>   |
| 66748  | NM_025744                                           | Erich2        | glutamate rich 2                                            | <b>-2.62</b>   |
| 69297  | NM_027026                                           | Lrrc46        | leucine rich repeat containing 46                           | <b>-2.12</b>   |
| 72614  | NM_028300                                           | Pih1d2        | PIH1 domain containing 2                                    | <b>-2.34</b>   |
| 14709  | NM_010320                                           | Gng8          | guanine nucleotide binding protein (G protein), gamma 8     | <b>-2.16</b>   |
| 242253 | NM_172864                                           | Wdr63         | WD repeat domain 63                                         | <b>-3.70</b>   |
| 381077 | NM_001165929                                        | Ccdc78        | coiled-coil domain containing 78                            | <b>-3.49</b>   |
| 626870 | NM_001037928                                        | Gm11992       | predicted gene 11992                                        | <b>-2.97</b>   |
| 72236  | NM_024445                                           | Tsnaxip1      | translin-associated factor X (Tsnax) interacting protein 1  | <b>-3.98</b>   |
| 320152 | NR_030693                                           | 4930412C18Rik | RIKEN cDNA 4930412C18 gene                                  | <b>-2.01</b>   |
| 56296  | NM_019872                                           | Dmrtb1        | DMRT-like family B with proline-rich C-terminal, 1          | <b>-2.34</b>   |
| 320662 | NM_177222                                           | Casc1         | cancer susceptibility candidate 1                           | <b>-2.33</b>   |
| 70882  | NM_001081083,NM_001271563,NM_001271564,NM_001271565 | Armc3         | armadillo repeat containing 3                               | <b>-2.91</b>   |



|           |                                               |               |                                                       |              |
|-----------|-----------------------------------------------|---------------|-------------------------------------------------------|--------------|
| 320784    | NR_131127,NR_131128                           | C230072F16Rik | RIKEN cDNA C230072F16 gene                            | <b>-3.26</b> |
| 626596    | NM_001195748                                  | Rgs22         | regulator of G-protein signalling 22                  | <b>-2.60</b> |
| 23985     | NM_011867                                     | Slc26a4       | solute carrier family 26, member 4                    | <b>-2.57</b> |
| 66402     | NM_025540                                     | Sln           | sarcolipin                                            | <b>-3.27</b> |
| 56173     | NM_001165925,NM_001165926,NM_019500           | Cldn14        | claudin 14                                            | <b>-2.89</b> |
| 21331     | NM_001161832                                  | T2            | brachyury 2                                           | <b>-2.28</b> |
| 13592     | NM_001276387,NM_010095                        | Ebf2          | early B cell factor 2                                 | <b>-2.57</b> |
| 100503311 | NM_001200028,NM_029604                        | Pifo          | primary cilia formation                               | <b>-2.53</b> |
| 27411     | NM_001110273,NM_001110274,NM_030683,NM_207651 | Slc14a2       | solute carrier family 14 (urea transporter), member 2 | <b>-3.85</b> |
| 20850     | NM_001164062,NM_011488                        | Stat5a        | signal transducer and activator of transcription 5A   | <b>-2.08</b> |
| 242037    | NM_001033349                                  | Ankub1        | ankrin repeat and ubiquitin domain containing 1       | <b>-2.10</b> |
| 215772    | NM_001127353                                  | Adgb          | androglobin                                           | <b>-2.31</b> |
| 21645     | NM_013688                                     | Tcte1         | t-complex-associated testis expressed 1               | <b>-2.49</b> |
| 71227     | NM_027725,NR_027636                           | Daw1          | dynein assembly factor with WDR repeat domains 1      | <b>-2.82</b> |
| 230099    | NM_139305                                     | Car9          | carbonic anhydrase 9                                  | <b>-3.16</b> |
| 235505    | NM_153098                                     | Cd109         | CD109 antigen                                         | <b>-3.17</b> |
| 239591    | NM_172818                                     | Ttll8         | tubulin tyrosine ligase-like family, member 8         | <b>-2.14</b> |
| 333670    | NM_001277132                                  | Gm867         | predicted gene 867                                    | <b>-2.83</b> |
| 210762    | NM_001163103                                  | Ppp1r36       | protein phosphatase 1, regulatory subunit 36          | <b>-3.45</b> |
| 74230     | NM_198637                                     | 1700016K19Rik | RIKEN cDNA 1700016K19 gene                            | <b>-2.26</b> |
| 329831    | NM_001162381,NM_177377                        | Fam166b       | family with sequence similarity 166, member B         | <b>-3.05</b> |
| 68625     | NM_026789                                     | Cfap57        | cilia and flagella associated protein 57              | <b>-2.06</b> |
| 16840     | NM_001310655,NM_010701                        | Lect1         | leukocyte cell derived chemotaxin 1                   | <b>-2.71</b> |
| 75732     | NM_029408                                     | lqcd          | IQ motif containing D                                 | <b>-2.34</b> |
| 66722     | NM_001271533,NM_025728,NM_029160              | Spag16        | sperm associated antigen 16                           | <b>-3.12</b> |
| 74918     | NM_029122                                     | lqca          | IQ motif containing with AAA domain                   | <b>-2.38</b> |
| 75172     | NM_029195                                     | Ccdc146       | coiled-coil domain containing 146                     | <b>-2.74</b> |
| 71877     | NM_027974                                     | Efhc1         | EF-hand domain (C-terminal) containing 1              | <b>-2.31</b> |
| 72962     | NM_138302                                     | Tymp          | thymidine phosphorylase                               | <b>-2.48</b> |
| 382077    | NM_001166282,NM_001311085,NM_029212           | Ccdc33        | coiled-coil domain containing 33                      | <b>-2.12</b> |

|           |                                                                   |               |                                                                                       |              |
|-----------|-------------------------------------------------------------------|---------------|---------------------------------------------------------------------------------------|--------------|
| 319750    | NR_077237, NR_077238, NR_077239                                   | A230009B12Rik | RIKEN cDNA A230009B12 gene                                                            | <b>-2.18</b> |
| 170442    | NM_130452                                                         | Bbox1         | butyrobetaine (gamma), 2-oxoglutarate dioxygenase 1 (gamma-butyrobetaine hydroxylase) | <b>-2.05</b> |
| 29862     | NM_001347432, NM_016718                                           | Ninj2         | ninjurin 2                                                                            | <b>-2.13</b> |
| 75973     | NM_001303469                                                      | Ccdc162       | coiled-coil domain containing 162                                                     | <b>-3.22</b> |
| 12839     | NM_001290691, NM_007740                                           | Col9a1        | collagen, type IX, alpha 1                                                            | <b>-2.85</b> |
| 338348    | NM_001290563, NM_001290564, NM_001290566, NM_001290567, NM_177384 | Ttc16         | tetratricopeptide repeat domain 16                                                    | <b>-2.87</b> |
| 12587     | NM_019394                                                         | Mia           | melanoma inhibitory activity                                                          | <b>-2.57</b> |
| 102635561 | NR_131197, NR_131201                                              | Ggnbp2os      | gametogenetin binding protein 2, opposite strand                                      | <b>-2.00</b> |
| 76670     | NM_001163638, NM_001163639, NM_029698                             | Cfap70        | cilia and flagella associated protein 70                                              | <b>-2.63</b> |
| 75568     | NM_029341                                                         | Capsl         | calcyphosine-like                                                                     | <b>-2.30</b> |
| 234878    | NM_145608                                                         | BC021891      | cDNA sequence BC021891                                                                | <b>-2.02</b> |
| 328035    | NM_178035                                                         | Fads6         | fatty acid desaturase domain family, member 6                                         | <b>-2.21</b> |
| 80893     | NM_030709                                                         | Tmprss5       | transmembrane protease, serine 5 (spinesin)                                           | <b>-2.41</b> |
| 16533     | NM_031169                                                         | Kcnmb1        | potassium large conductance calcium-activated channel, subfamily M, beta member 1     | <b>-2.19</b> |
| 270091    | NM_001033371, NM_001170788, NM_001170789                          | Lrrc36        | leucine rich repeat containing 36                                                     | <b>-3.24</b> |
| 243937    | NM_172385                                                         | Zfp536        | zinc finger protein 536                                                               | <b>-2.57</b> |
| 74685     | NM_001145435, NM_029053                                           | Lrrc74b       | leucine rich repeat containing 74B                                                    | <b>-3.18</b> |
| 71860     | NM_027963                                                         | Cfap52        | cilia and flagella associated protein 52                                              | <b>-3.33</b> |
| 100503147 | NR_040369                                                         | Gm13293       | predicted gene 13293                                                                  | <b>-3.09</b> |
| 381522    | NM_198660                                                         | Ccdc180       | coiled-coil domain containing 180                                                     | <b>-2.67</b> |
| 319767    | NM_176999                                                         | Atp10b        | ATPase, class V, type 10B                                                             | <b>-2.09</b> |
| 73075     | NM_028430                                                         | Ppil6         | peptidylprolyl isomerase (cyclophilin)-like 6                                         | <b>-2.01</b> |
| 17349     | NM_001039543, NM_010801                                           | Mlf1          | myeloid leukemia factor 1                                                             | <b>-3.14</b> |
| 170935    | NM_001159321, NM_001347529, NM_133355                             | Grid2ip       | glutamate receptor, ionotropic, delta 2 (Grid2) interacting protein 1                 | <b>-3.14</b> |
| 219170    | NM_177629                                                         | Fam216b       | family with sequence similarity 216, member B                                         | <b>-3.21</b> |
| 381546    | NM_001034876                                                      | Ccdc24        | coiled-coil domain containing 24                                                      | <b>-2.65</b> |
| 436022    | NM_001033548                                                      | Dnaaf3        | dynein, axonemal assembly factor 3                                                    | <b>-2.41</b> |

|           |                                                            |               |                                                         |              |
|-----------|------------------------------------------------------------|---------------|---------------------------------------------------------|--------------|
| 13813     | NM_001164789,NM_010136                                     | Eomes         | eomesodermin                                            | <b>-3.78</b> |
| 320277    | NM_001305042,NM_001305044,NM_177123                        | Spef2         | sperm flagellar 2                                       | <b>-2.78</b> |
| 75556     | NM_029335                                                  | Cfap161       | cilia and flagella associated protein 161               | <b>-3.03</b> |
| 75465     | NM_029297                                                  | Dynlrb2       | dynein light chain roadblock-type 2                     | <b>-2.89</b> |
| 71870     | NM_027972                                                  | Cfap45        | cilia and flagella associated protein 45                | <b>-2.04</b> |
| 320214    | NM_001081025                                               | Maats1        | MYCBP-associated, testis expressed 1                    | <b>-2.01</b> |
| 212190    | NM_001285928,NM_001285929,NM_001285930,NM_178671,NR_104373 | Ubxn10        | UBX domain protein 10                                   | <b>-2.35</b> |
| 192650    | NM_138948                                                  | Cabp7         | calcium binding protein 7                               | <b>-3.01</b> |
| 319951    | NR_040391                                                  | A230001M10Rik | RIKEN cDNA A230001M10 gene                              | <b>-2.69</b> |
| 67752     | NM_133689                                                  | Ppp1r32       | protein phosphatase 1, regulatory subunit 32            | <b>-2.32</b> |
| 102635783 | NR_137202                                                  | Gm11266       | predicted gene 11266                                    | <b>-2.08</b> |
| 70113     | NM_001013022                                               | Odf3b         | outer dense fiber of sperm tails 3B                     | <b>-2.74</b> |
| 15186     | NM_008230                                                  | Hdc           | histidine decarboxylase                                 | <b>-2.88</b> |
| 68764     | NM_001024478                                               | Cdhr3         | cadherin-related family member 3                        | <b>-2.48</b> |
| 74485     | NM_028971                                                  | Lrrc71        | leucine rich repeat containing 71                       | <b>-2.38</b> |
| 75563     | NM_175223                                                  | Dnali1        | dynein, axonemal, light intermediate polypeptide 1      | <b>-3.80</b> |
| 244653    | NM_172916                                                  | Hydin         | HYDIN, axonemal central pair apparatus protein          | <b>-2.56</b> |
| 13411     | NM_010060                                                  | Dnah11        | dynein, axonemal, heavy chain 11                        | <b>-3.38</b> |
| 433700    | NM_001007463,NM_001290462                                  | Spag8         | sperm associated antigen 8                              | <b>-2.03</b> |
| 74199     | NM_001197028,NM_028813                                     | Vit           | vitrin                                                  | <b>-2.08</b> |
| 53374     | NM_016803                                                  | Chst3         | carbohydrate (chondroitin 6/keratan) sulfotransferase 3 | <b>-2.04</b> |
| 75600     | NM_001102468,NM_138304                                     | Calml4        | calmodulin-like 4                                       | <b>-4.78</b> |
| 17295     | NM_008591                                                  | Met           | met proto-oncogene                                      | <b>-2.25</b> |
| 208613    | NM_001164437                                               | Tmem212       | transmembrane protein 212                               | <b>-3.32</b> |
| 74052     | NM_028735                                                  | Ttc21a        | tetratricopeptide repeat domain 21A                     | <b>-2.72</b> |
| 21689     | NM_001282006,NM_001282007,NM_011569                        | Tekt1         | tektin 1                                                | <b>-2.31</b> |
| 71233     | NM_027728                                                  | Enkur         | enkurin, TRPC channel interacting protein               | <b>-2.04</b> |
| 243277    | NM_001081342,NM_001347486                                  | Adgrd1        | adhesion G protein-coupled receptor D1                  | <b>-2.21</b> |
| 18025     | NM_010903                                                  | Nfe2l3        | nuclear factor, erythroid derived 2, like 3             | <b>-2.62</b> |
| 19130     | NM_008937                                                  | Prox1         | prospero homeobox 1                                     | <b>-2.10</b> |

|        |                                                  |               |                                                               |              |
|--------|--------------------------------------------------|---------------|---------------------------------------------------------------|--------------|
| 320145 | NM_177082                                        | Sp8           | trans-acting transcription factor 8                           | <b>-2.10</b> |
| 241112 | NM_001033345                                     | Catip         | ciliogenesis associated TTC17 interacting protein             | <b>-2.61</b> |
| 330554 | NM_177893                                        | Fan1          | FANCD2/FANCI-associated nuclease 1                            | <b>-2.01</b> |
| 246707 | NM_145158                                        | Emilin2       | elastin microfibril interfacier 2                             | <b>-2.15</b> |
| 75426  | NM_018741                                        | Igfbp1        | insulin-like growth factor binding protein-like 1             | <b>-2.25</b> |
| 21952  | NM_001112702,NM_021467                           | Tnni1         | troponin I, skeletal, slow 1                                  | <b>-2.60</b> |
| 73667  | NM_001201332,NM_001201333                        | 2410004P03Rik | RIKEN cDNA 2410004P03 gene                                    | <b>-2.50</b> |
| 97440  | NM_001271915,NM_178879                           | B3gnt9        | UDP-GlcNAc:betaGal beta-1,3-N-acetylglucosaminyltransferase 9 | <b>-2.09</b> |
| 320078 | NM_177068                                        | Olfml2b       | olfactomedin-like 2B                                          | <b>-3.21</b> |
| 381284 | NM_001310428                                     | Crocc2        | ciliary rootlet coiled-coil, rootletin family member 2        | <b>-3.60</b> |
| 104601 | NM_170671                                        | Mycbpap       | MYCBP associated protein                                      | <b>-2.02</b> |
| 211535 | NM_001033243                                     | Ccdc114       | coiled-coil domain containing 114                             | <b>-2.03</b> |
| 243538 | NM_173775                                        | Cfap100       | cilia and flagella associated protein 100                     | <b>-2.12</b> |
| 242546 | NM_001100182                                     | Cyp2j12       | cytochrome P450, family 2, subfamily j, polypeptide 12        | <b>-2.55</b> |
| 329782 | NR_040398,NR_040399,NR_040400                    | 4930570G19Rik | RIKEN cDNA 4930570G19 gene                                    | <b>-3.04</b> |
| 30938  | NM_015759                                        | Fgd3          | FYVE, RhoGEF and PH domain containing 3                       | <b>-2.05</b> |
| 320871 | NR_033532                                        | B230206H07Rik | RIKEN cDNA B230206H07 gene                                    | <b>-3.15</b> |
| 629147 | NM_001134697                                     | Ctxn3         | cortexin 3                                                    | <b>-2.66</b> |
| 78801  | NM_030187                                        | Ak7           | adenylate kinase 7                                            | <b>-2.93</b> |
| 231991 | NM_001327821,NM_172728                           | Creb5         | cAMP responsive element binding protein 5                     | <b>-2.86</b> |
| 16977  | NM_001302555                                     | Lrrc23        | leucine rich repeat containing 23                             | <b>-2.57</b> |
| 237806 | NM_001099633                                     | Dnah9         | dynein, axonemal, heavy chain 9                               | <b>-2.09</b> |
| 330355 | NM_001164669                                     | Dnah6         | dynein, axonemal, heavy chain 6                               | <b>-2.86</b> |
| 239827 | NM_172822                                        | Pigz          | phosphatidylinositol glycan anchor biosynthesis, class Z      | <b>-2.17</b> |
| 56087  | NM_019536                                        | Dnah10        | dynein, axonemal, heavy chain 10                              | <b>-2.42</b> |
| 227485 | NM_001081386                                     | Cdh19         | cadherin 19, type 2                                           | <b>-2.03</b> |
| 19144  | NM_001164696,NM_001164697,NM_001164698,NM_011177 | Klk6          | kallikrein related-peptidase 6                                | <b>-2.14</b> |
| 214112 | NM_172524                                        | Nipal4        | NIPA-like domain containing 4                                 | <b>-2.10</b> |
| 22092  | NM_025290                                        | Rsph1         | radial spoke head 1 homolog (Chlamydomonas)                   | <b>-2.21</b> |

|        |                                                         |          |                                                                                                |              |
|--------|---------------------------------------------------------|----------|------------------------------------------------------------------------------------------------|--------------|
| 68817  | NM_001017966                                            | Ddi2     | DNA-damage inducible protein 2                                                                 | <b>-2.04</b> |
| 104681 | NM_001029842,NM_134038                                  | Slc16a6  | solute carrier family 16 (monocarboxylic acid transporters), member 6                          | <b>-2.02</b> |
| 101488 | NM_001252530,NM_001252531,NM_175316                     | Slco2b1  | solute carrier organic anion transporter family, member 2b1                                    | <b>-2.71</b> |
| 214944 | NM_178061                                               | Mob3b    | MOB kinase activator 3B                                                                        | <b>-2.42</b> |
| 270150 | NM_001081369                                            | Ccdc153  | coiled-coil domain containing 153                                                              | <b>-3.58</b> |
| 26558  | NM_001146153,NM_011984                                  | Homer3   | homer scaffolding protein 3                                                                    | <b>-2.16</b> |
| 244198 | NM_172907                                               | Olfml1   | olfactomedin-like 1                                                                            | <b>-2.11</b> |
| 22774  | NM_009576                                               | Zic4     | zinc finger protein of the cerebellum 4                                                        | <b>-2.46</b> |
| 240690 | NM_001244692,NM_001244693,NM_173868,NR_045188,NR_045189 | St18     | suppression of tumorigenicity 18                                                               | <b>-2.16</b> |
| 230678 | NM_172383                                               | Tmem125  | transmembrane protein 125                                                                      | <b>-2.62</b> |
| 21828  | NM_011582                                               | Thbs4    | thrombospondin 4                                                                               | <b>-4.14</b> |
| 223838 | NM_001164785,NM_001164786,NM_177431                     | Adamts20 | a disintegrin-like and metallopeptidase (reprolysin type) with thrombospondin type 1 motif, 20 | <b>-2.53</b> |
| 12819  | NM_009928                                               | Col15a1  | collagen, type XV, alpha 1                                                                     | <b>-2.32</b> |
| 22066  | NM_001253682,NM_001253683,NM_016984,NR_046161           | Trpc4    | transient receptor potential cation channel, subfamily C, member 4                             | <b>-2.38</b> |
| 71660  | NM_001347167,NM_001347168,NM_027852                     | Rarres2  | retinoic acid receptor responder (tazarotene induced) 2                                        | <b>-2.28</b> |
| 229595 | NM_001301705,NM_144899                                  | Adamtsl4 | ADAMTS-like 4                                                                                  | <b>-2.07</b> |
| 436090 | NM_001159652                                            | Gpr62    | G protein-coupled receptor 62                                                                  | <b>-2.07</b> |
| 320981 | NM_177304                                               | Enpp6    | ectonucleotide pyrophosphatase/phosphodiesterase 6                                             | <b>-2.39</b> |
| 66222  | NM_025429                                               | Serpib1a | serine (or cysteine) peptidase inhibitor, clade B, member 1a                                   | <b>-2.18</b> |
| 18553  | NM_001291184,NM_011048                                  | Pcsk6    | proprotein convertase subtilisin/kexin type 6                                                  | <b>-2.11</b> |
| 15223  | NM_008240                                               | Foxj1    | forkhead box J1                                                                                | <b>-2.43</b> |
| 380702 | NM_001034874                                            | Shisa6   | shisa family member 6                                                                          | <b>-2.28</b> |
| 30930  | NM_001113355,NM_133672                                  | Vps26a   | VPS26 retromer complex component A                                                             | <b>-2.52</b> |
| 72446  | NM_001083810,NM_001110849,NM_175181                     | Prr5l    | proline rich 5 like                                                                            | <b>-2.19</b> |
| 241116 | NM_001039495                                            | Ccdc108  | coiled-coil domain containing 108                                                              | <b>-2.68</b> |
| 14618  | NM_001302496,NM_001302497,NM_001302498,NM_008124        | Gjb1     | gap junction protein, beta 1                                                                   | <b>-2.48</b> |
| 12835  | NM_001243008,NM_001243009                               | Col6a3   | collagen, type VI, alpha 3                                                                     | <b>-3.66</b> |
| 94226  | NM_053190                                               | S1pr5    | sphingosine-1-phosphate receptor 5                                                             | <b>-2.31</b> |

|        |                                                                                             |         |                                                                              |              |
|--------|---------------------------------------------------------------------------------------------|---------|------------------------------------------------------------------------------|--------------|
| 338367 | NM_177390                                                                                   | Myo1d   | myosin ID                                                                    | <b>-2.08</b> |
| 22772  | NM_009574                                                                                   | Zic2    | zinc finger protein of the cerebellum 2                                      | <b>-2.03</b> |
| 74318  | NM_001159900,NM_001159901,NM_175606                                                         | Hopx    | HOP homeobox                                                                 | <b>-2.21</b> |
| 118454 | NM_080454,NM_175452                                                                         | Gjc2    | gap junction protein, gamma 2                                                | <b>-2.19</b> |
| 11484  | NM_023113                                                                                   | Aspa    | aspartoacylase                                                               | <b>-2.22</b> |
| 18720  | NM_001293707,NM_008847                                                                      | Pip5k1a | phosphatidylinositol-4-phosphate 5-kinase, type 1 alpha                      | <b>-2.61</b> |
| 12521  | NM_001136055,NM_001271430,NM_001271431,NM_001271432,<br>NM_001271461,NM_001271462,NM_007656 | Cd82    | CD82 antigen                                                                 | <b>-2.11</b> |
| 66949  | NM_025863                                                                                   | Trim59  | tripartite motif-containing 59                                               | <b>-2.07</b> |
| 74008  | NM_001166177,NM_028710                                                                      | Arsg    | arylsulfatase G                                                              | <b>-2.12</b> |
| 56722  | NM_019980                                                                                   | Litaf   | LPS-induced TN factor                                                        | <b>-2.15</b> |
| 20562  | NM_015748                                                                                   | Slit1   | slit homolog 1 (Drosophila)                                                  | <b>-2.01</b> |
| 22771  | NM_009573                                                                                   | Zic1    | zinc finger protein of the cerebellum 1                                      | <b>-2.04</b> |
| 107449 | NM_029770                                                                                   | Unc5b   | unc-5 netrin receptor B                                                      | <b>-2.47</b> |
| 14017  | NM_001033711,NM_010161                                                                      | Evi2a   | ecotropic viral integration site 2a                                          | <b>-2.06</b> |
| 226115 | NM_153520                                                                                   | Opalin  | oligodendrocytic myelin paranodal and inner loop protein                     | <b>-2.38</b> |
| 18753  | NM_001310682,NM_011103                                                                      | Prkcd   | protein kinase C, delta                                                      | <b>-2.25</b> |
| 211945 | NM_181073                                                                                   | Plekhh1 | pleckstrin homology domain containing, family H (with MyTH4 domain) member 1 | <b>-2.14</b> |
| 117160 | NM_053273                                                                                   | Ttyh2   | tweety family member 2                                                       | <b>-2.03</b> |
| 14763  | NM_010338                                                                                   | Gpr37   | G protein-coupled receptor 37                                                | <b>-2.34</b> |
| 225908 | NM_001033481                                                                                | Myrf    | myelin regulatory factor                                                     | <b>-2.03</b> |
| 52589  | NM_001170866,NM_001170867,NM_001170868,NM_134094                                            | Ncald   | neurocalcin delta                                                            | <b>-4.92</b> |
| 67801  | NM_026385                                                                                   | Plip    | plasma membrane proteolipid                                                  | <b>-2.16</b> |
| 17441  | NM_010814                                                                                   | Mog     | myelin oligodendrocyte glycoprotein                                          | <b>-2.20</b> |
| 320587 | NM_001033394                                                                                | Tmem88b | transmembrane protein 88B                                                    | <b>-2.22</b> |
| 20602  | NM_001253904,NM_001253905,NM_011424                                                         | Ncor2   | nuclear receptor co-repressor 2                                              | <b>-2.02</b> |
| 14580  | NM_001131020,NM_010277                                                                      | Gfap    | glial fibrillary acidic protein                                              | <b>-2.17</b> |
| 17136  | NM_001346084,NM_001346085,NM_001346086,<br>NM_001346087,NM_001346088,NM_001346089,NM_010758 | Mag     | myelin-associated glycoprotein                                               | <b>-2.07</b> |
| 22041  | NM_133977                                                                                   | Trf     | transferrin                                                                  | <b>-2.24</b> |

|       |                        |      |                                              |              |
|-------|------------------------|------|----------------------------------------------|--------------|
| 12799 | NM_001146318,NM_009923 | Cnp  | 2',3'-cyclic nucleotide 3' phosphodiesterase | <b>-2.10</b> |
| 18770 | NM_001099779,NM_013631 | Pklr | pyruvate kinase liver and red blood cell     | <b>-4.63</b> |

**Table S5 Common up-regulated genes in the striatum of WT mice before/after METH treatment**

| <b>Gene_ID</b> | <b>Transcript_ID</b>                             | <b>Gene_Symbol</b> | <b>Gene title</b>                                         | <b>Mean fold change</b> |
|----------------|--------------------------------------------------|--------------------|-----------------------------------------------------------|-------------------------|
| 30054          | NM_001033043                                     | Rnf17              | ring finger protein 17                                    | <b>2.42</b>             |
| 30930          | NM_001113355,NM_133672                           | Vps26a             | VPS26 retromer complex component A                        | <b>2.76</b>             |
| 52588          | NM_001316748,NM_145928                           | Tspan14            | tetraspanin 14                                            | <b>2.07</b>             |
| 69513          | NR_015521                                        | 1700030C10Rik      | RIKEN cDNA 1700030C10 gene                                | <b>2.15</b>             |
| 72046          | NM_001077661,NM_178623                           | Urgcp              | upregulator of cell proliferation                         | <b>2.10</b>             |
| 72215          | NM_028156                                        | 1700001P01Rik      | RIKEN cDNA 1700001P01 gene                                | <b>2.23</b>             |
| 93705          | NM_033580                                        | Pcdhgb8            | protocadherin gamma subfamily B, 8                        | <b>2.64</b>             |
| 213393         | NM_001166580,NM_145980                           | 8430408G22Rik      | RIKEN cDNA 8430408G22 gene                                | <b>2.69</b>             |
| 213945         | NM_001037865                                     | Col28a1            | collagen, type XXVIII, alpha 1                            | <b>2.27</b>             |
| 229599         | NM_001033302                                     | Ciart              | circadian associated repressor of transcription           | <b>3.06</b>             |
| 241636         | NM_001289747,NM_001289748,NM_001289749,NM_177726 | Tgm6               | transglutaminase 6                                        | <b>2.71</b>             |
| 241638         | NM_001291027,NM_001291028,NM_197945              | Lzts3              | leucine zipper, putative tumor suppressor family member 3 | <b>3.41</b>             |
| 381823         | NM_001109914                                     | Apold1             | apolipoprotein L domain containing 1                      | <b>2.81</b>             |
| 664987         | NM_001085546                                     | Gm14393            | predicted gene 14393                                      | <b>2.22</b>             |
| 100039796      | NM_001145164                                     | Tgtp2              | T cell specific GTPase 2                                  | <b>2.58</b>             |
| 100379145      | NR_033336                                        | Snora23            | small nucleolar RNA, H/ACA box 23                         | <b>4.39</b>             |
| 100417829      | NR_040453,NR_040453_dup1                         | Gm17757            | predicted gene, 17757                                     | <b>2.59</b>             |
| 100502959      | NR_040442                                        | AV051173           | expressed sequence AV051173                               | <b>2.71</b>             |
| 102465593      | NR_105948                                        | Mir6982            | microRNA 6982                                             | <b>2.58</b>             |
| 102465599      | NR_105958                                        | Mir6992            | microRNA 6992                                             | <b>2.29</b>             |



**Table S6 Common down-regulated genes in the striatum of WT mice before/after METH treatment**

| <b>Gene_ID</b> | <b>Transcript_ID</b>                   | <b>Gene_Symbol</b> | <b>Gene title</b>                                                          | <b>Mean fold change</b> |
|----------------|----------------------------------------|--------------------|----------------------------------------------------------------------------|-------------------------|
| 21350          | NM_009317                              | Tal2               | T cell acute lymphocytic leukemia 2                                        | <b>-3.17</b>            |
| 24047          | NM_011888                              | Ccl19              | chemokine (C-C motif) ligand 19                                            | <b>-2.28</b>            |
| 29863          | NM_001347366,NM_013875                 | Pde7b              | phosphodiesterase 7B                                                       | <b>-2.78</b>            |
| 50789          | NM_001347600,NM_001347601,NM_015822    | Fbxl3              | F-box and leucine-rich repeat protein 3                                    | <b>-2.71</b>            |
| 64817          | NM_022814                              | Svep1              | sushi, von Willebrand factor type A, EGF and pentraxin domain containing 1 | <b>-2.32</b>            |
| 67886          | NM_001081360,NM_001347109,NM_001347110 | Camsap2            | calmodulin regulated spectrin-associated protein family, member 2          | <b>-2.09</b>            |
| 69303          | NR_038077                              | 1700001G11Rik      | RIKEN cDNA 1700001G11 gene                                                 | <b>-3.06</b>            |
| 70086          | NM_001162412,NM_133720                 | Cysltr2            | cysteinyl leukotriene receptor 2                                           | <b>-3.29</b>            |
| 71724          | NM_023617                              | Aox3               | aldehyde oxidase 3                                                         | <b>-2.07</b>            |
| 72813          | NR_029441                              | 2810454H06Rik      | RIKEN cDNA 2810454H06 gene                                                 | <b>-2.35</b>            |
| 72962          | NM_138302                              | Tymp               | thymidine phosphorylase                                                    | <b>-2.28</b>            |
| 74846          | NR_040505                              | 4930405A21Rik      | RIKEN cDNA 4930405A21 gene                                                 | <b>-2.24</b>            |
| 75084          | NR_015494,NR_027944,NR_027945          | 4930511M06Rik      | RIKEN cDNA 4930511M06 gene                                                 | <b>-3.69</b>            |
| 75958          | NR_131019                              | 5033403F01Rik      | RIKEN cDNA 5033403F01 gene                                                 | <b>-3.42</b>            |
| 78552          | NR_024324                              | E130201H02Rik      | RIKEN cDNA E130201H02 gene                                                 | <b>-3.72</b>            |
| 78977          | NM_024286                              | Popdc3             | popeye domain containing 3                                                 | <b>-2.11</b>            |
| 101118         | NM_001347059,NM_028990                 | Tmem168            | transmembrane protein 168                                                  | <b>-4.26</b>            |
| 109620         | NM_023842                              | Dsp                | desmoplakin                                                                | <b>-8.51</b>            |
| 117167         | NM_054098                              | Steap4             | STEAP family member 4                                                      | <b>-3.21</b>            |
| 171209         | NM_001310474,NM_183000                 | Asic3              | acid-sensing (proton-gated) ion channel 3                                  | <b>-2.05</b>            |
| 192650         | NM_138948                              | Cabp7              | calcium binding protein 7                                                  | <b>-2.16</b>            |
| 213208         | NM_001033543                           | Il20rb             | interleukin 20 receptor beta                                               | <b>-2.35</b>            |
| 216799         | NM_145827                              | Nlrp3              | NLR family, pyrin domain containing 3                                      | <b>-2.00</b>            |
| 230718         | NM_001085502                           | Nt5c1a             | 5'-nucleotidase, cytosolic IA                                              | <b>-2.04</b>            |
| 235320         | NM_001033324                           | Zbtb16             | zinc finger and BTB domain containing 16                                   | <b>-2.07</b>            |
| 243270         | NM_175520                              | Hcar1              | hydrocarboxylic acid receptor 1                                            | <b>-2.09</b>            |

|           |                                                                                                              |               |                                                                |              |
|-----------|--------------------------------------------------------------------------------------------------------------|---------------|----------------------------------------------------------------|--------------|
| 245683    | NM_001081667                                                                                                 | Klhl34        | kelch-like 34                                                  | <b>-3.82</b> |
| 257871    | NR_034155                                                                                                    | Olf1372-ps1   | olfactory receptor 1372, pseudogene 1                          | <b>-2.92</b> |
| 319859    | NR_015511                                                                                                    | E030011O05Rik | RIKEN cDNA E030011O05 gene                                     | <b>-3.11</b> |
| 320563    | NM_001161535,NM_001161536,NM_001161537,<br>NM_001161538,NM_001161539,NM_001161540,<br>NM_001161541,NM_177193 | Islr2         | immunoglobulin superfamily containing leucine-rich<br>repeat 2 | <b>-2.47</b> |
| 353235    | NM_201243                                                                                                    | Pcdha8        | protocadherin alpha 8                                          | <b>-6.97</b> |
| 735277    | NR_030479                                                                                                    | Mir697        | microRNA 697                                                   | <b>-3.16</b> |
| 100127433 | NR_133649                                                                                                    | Gm11532       | predicted gene 11532                                           | <b>-2.20</b> |
